# Supplementary material for: Insulin and IGF1 Receptors Are Essential for XX and XY Gonadal Differentiation and Adrenal Development in Mice
Source: PubMed Central journal article supplement (PMC3536656; doi:10.1371/journal.pgen.1003160), 2013-01-03

**molecular function**

|                                            |              | UP in DKO  | DOWN in DKO |
|--------------------------------------------|--------------|------------|-------------|
| <b>molecular function</b>                  | <b>18509</b> | <b>337</b> | <b>1197</b> |
| 0003700 transcription factor activity      | 721          | 33 / 13    | 56 / 47     |
| 0043565 sequence-specific DNA binding      | 615          | 29 / 11    | 48 / 40     |
| 0030528 transcription regulator activity   | 1244         | 48 / 23    | 114 / 81    |
| 0003824 catalytic activity                 | 4766         | 85 / 87    | 414 / 308   |
| 0043560 insulin receptor substrate binding | 10           | 0 / 0      | 6 / 1       |
| 0051427 hormone receptor binding           | 96           | 0 / 2      | 18 / 6      |
| 0043559 insulin binding                    | 6            | 0 / 0      | 4 / 0       |

**biological process**

|                                                              |              | UP in DKO  | DOWN in DKO |
|--------------------------------------------------------------|--------------|------------|-------------|
| <b>biological process</b>                                    | <b>18675</b> | <b>340</b> | <b>1206</b> |
| 0009888 tissue development                                   | 825          | 36 / 15    | 66 / 53     |
| 0007399 nervous system development                           | 1097         | 55 / 20    | 97 / 71     |
| 0001501 skeletal system development                          | 330          | 21 / 6     | 30 / 21     |
| 0051216 cartilage development                                | 105          | 10 / 2     | 6 / 7       |
| 0031643 positive regulation of myelination                   | 4            | 3 / 0      | 0 / 0       |
| 0007155 cell adhesion                                        | 566          | 36 / 10    | 42 / 37     |
| 0008152 metabolic process                                    | 7296         | 168 / 133  | 645 / 471   |
| 0033554 cellular response to stress                          | 608          | 8 / 11     | 79 / 39     |
| 0051716 cellular response to stimulus                        | 3431         | 80 / 63    | 286 / 222   |
| 0044267 cellular protein metabolic process                   | 2050         | 46 / 37    | 196 / 132   |
| 0044281 small molecule metabolic process                     | 1756         | 28 / 32    | 153 / 113   |
| 0006629 lipid metabolic process                              | 762          | 12 / 14    | 78 / 49     |
| 0008202 steroid metabolic process                            | 197          | 1 / 4      | 32 / 13     |
| 0006695 cholesterol biosynthetic process                     | 26           | 0 / 1      | 8 / 2       |
| 0006066 alcohol metabolic process                            | 418          | 2 / 8      | 46 / 27     |
| 0000278 mitotic cell cycle                                   | 358          | 3 / 7      | 42 / 23     |
| 0022402 cell cycle process                                   | 544          | 8 / 10     | 62 / 35     |
| 0006916 anti-apoptosis                                       | 156          | 3 / 3      | 27 / 10     |
| 0007548 sex differentiation                                  | 182          | 7 / 3      | 25 / 12     |
| 0046545 development of primary female sexual characteristics | 87           | 2 / 2      | 17 / 6      |
| 0008406 gonad development                                    | 131          | 5 / 2      | 20 / 9      |
| 0048545 response to steroid hormone stimulus                 | 151          | 4 / 3      | 22 / 10     |
| 0043406 positive regulation of MAP kinase activity           | 106          | 4 / 2      | 18 / 7      |
| 0045860 positive regulation of protein kinase activity       | 247          | 10 / 5     | 31 / 16     |

**cellular component**

|                              |              | UP in DKO  | DOWN in DKO |
|------------------------------|--------------|------------|-------------|
| <b>cellular component</b>    | <b>18880</b> | <b>345</b> | <b>1219</b> |
| 0031012 extracellular matrix | 320          | 18 / 6     | 22 / 21     |
| 0005925 focal adhesion       | 99           | 9 / 2      | 12 / 6      |
| 0005634 nucleus              | 4509         | 138 / 82   | 447 / 291   |
| 0044444 cytoplasmic part     | 5163         | 107 / 94   | 448 / 333   |
| 0005739 mitochondrion        | 1365         | 18 / 25    | 118 / 88    |

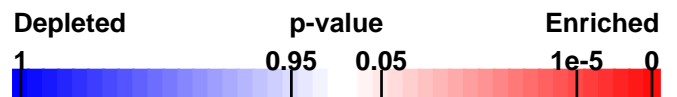

Supplement: pgen.1003160.s005.pdf [file pgen.1003160.s005.pdf]
