# Supplementary material for: Insulin and IGF1 Receptors Are Essential for XX and XY Gonadal Differentiation and Adrenal Development in Mice
Source: PubMed Central journal article supplement (PMC3536656; doi:10.1371/journal.pgen.1003160), 2013-01-03

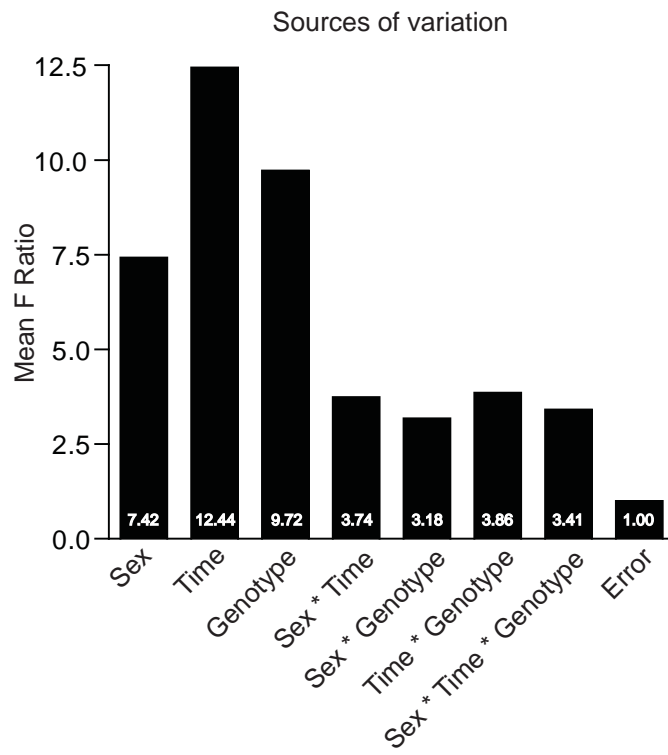

Pitetti\_Supp.Fig8B (I) Male genes

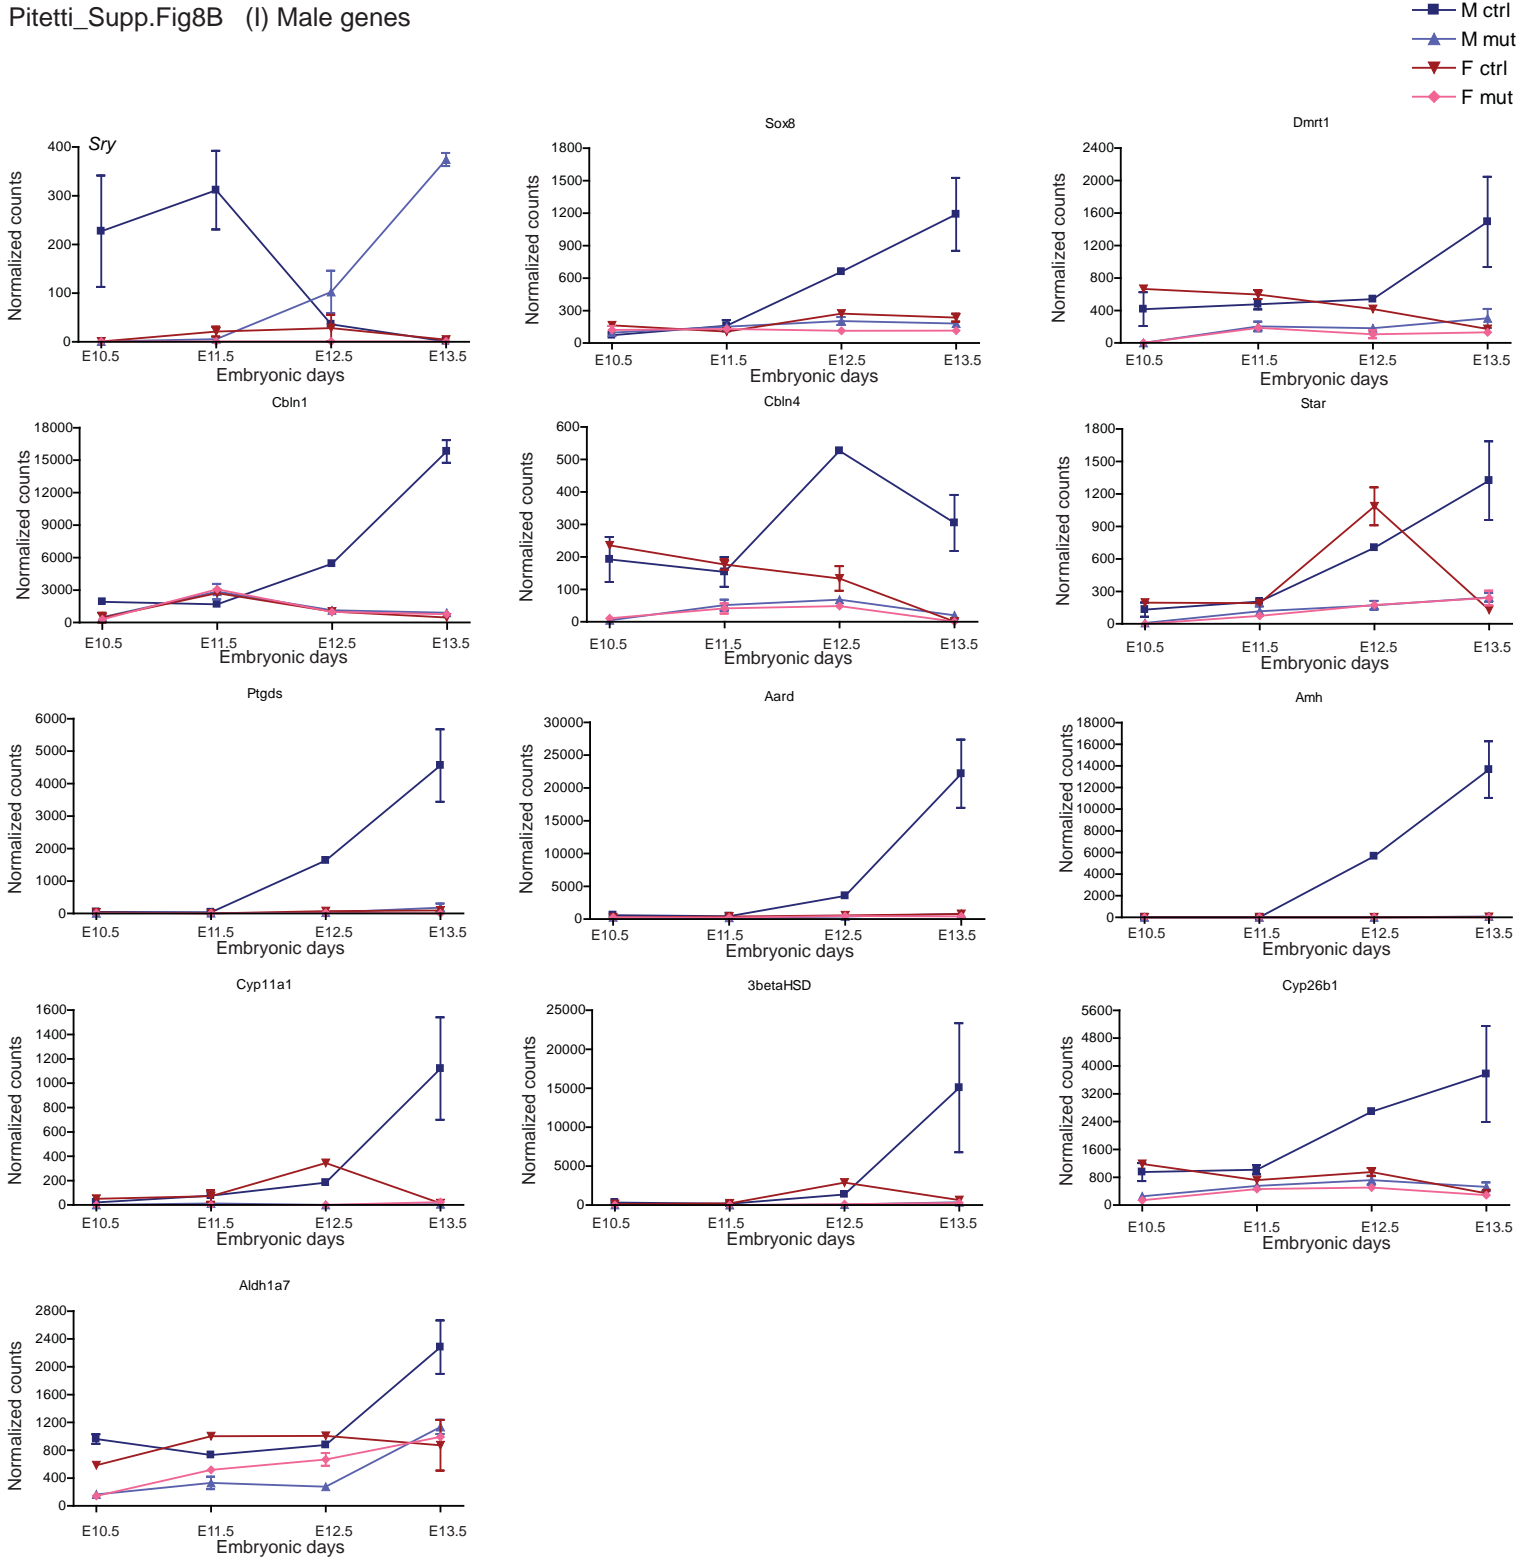

Pitetti\_Supp.Fig8B (II) Female genes

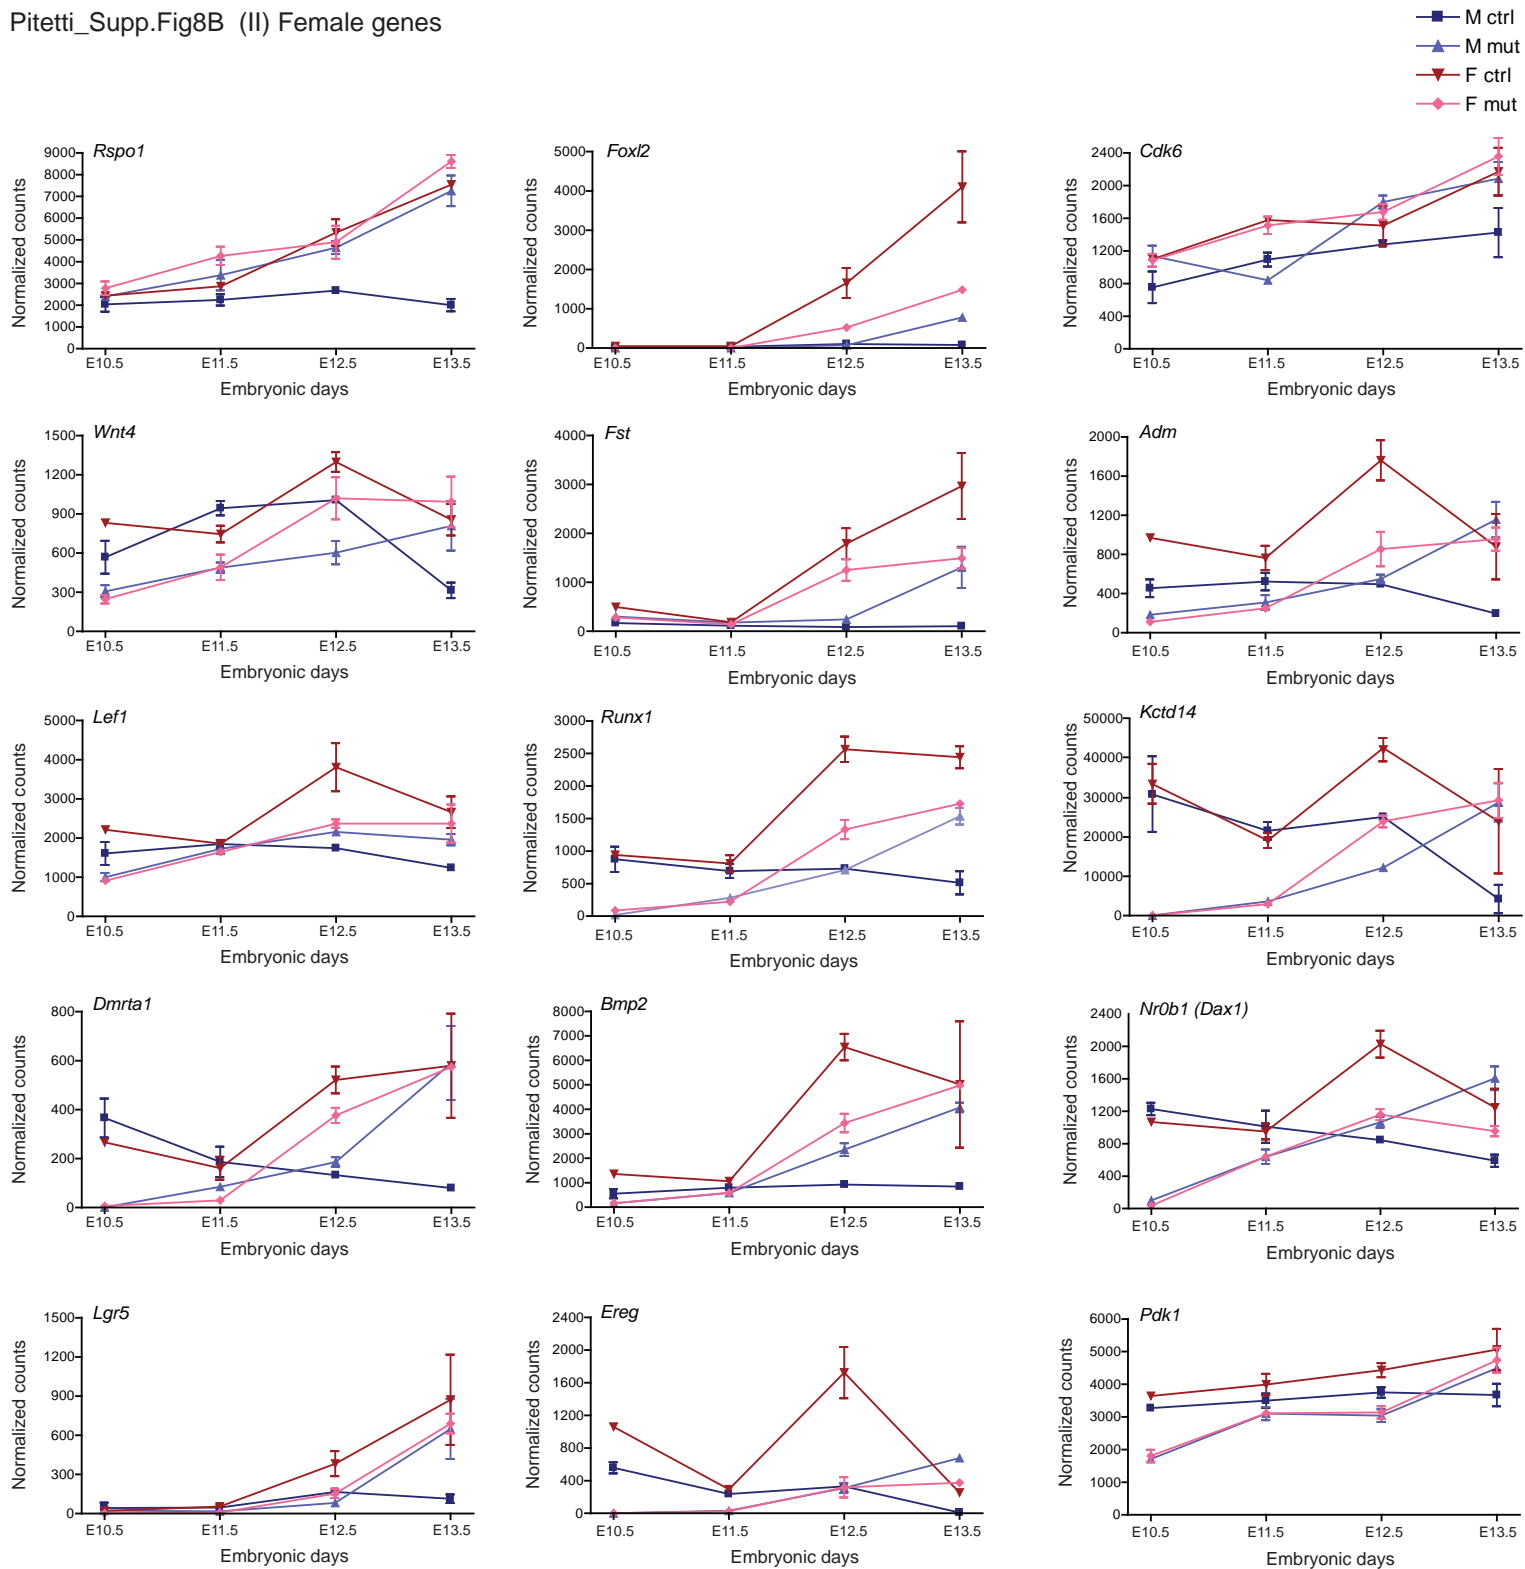

Pitetti\_Supp.Fig8B (III) Adreno-gonadal development genes

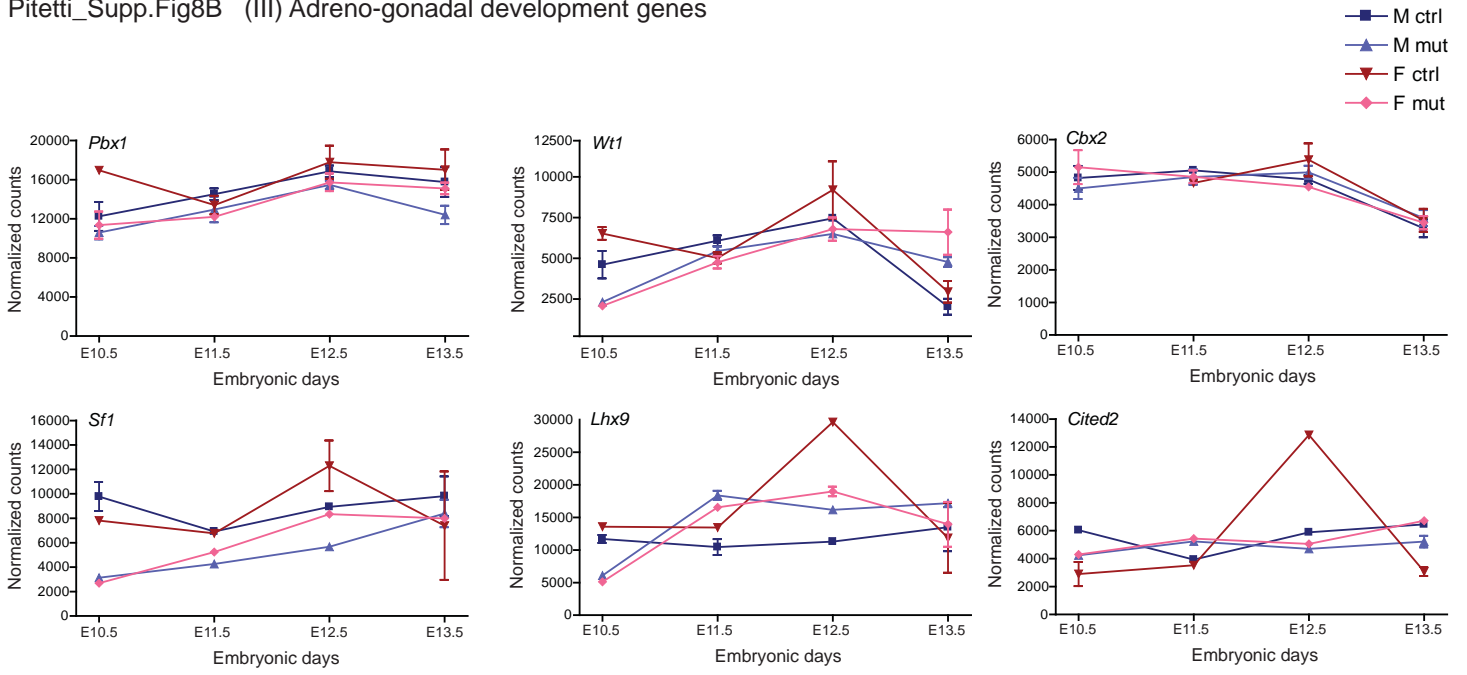

-

Pitetti\_Supp.Fig8B (IV) Miscellaneous genes

■ M ctrl  
▲ M mut  
▼ F ctrl  
◆ F mut

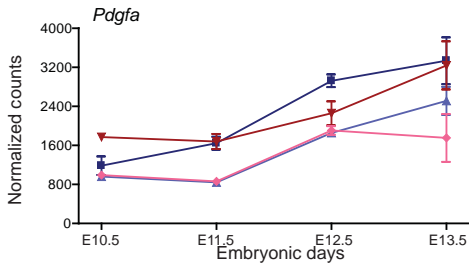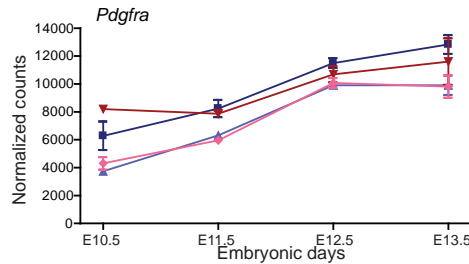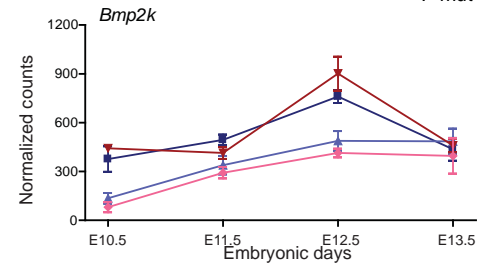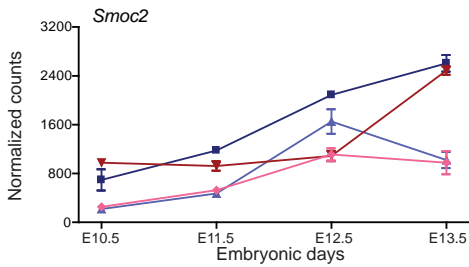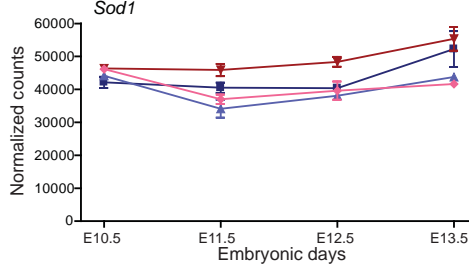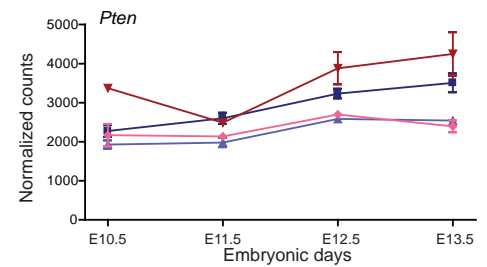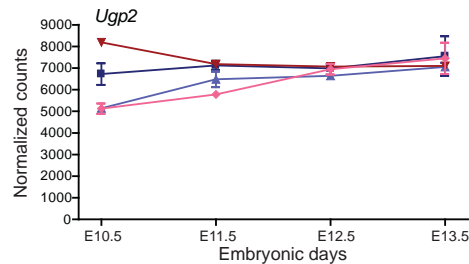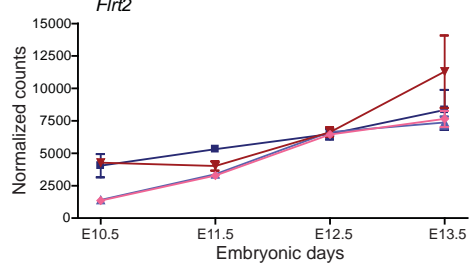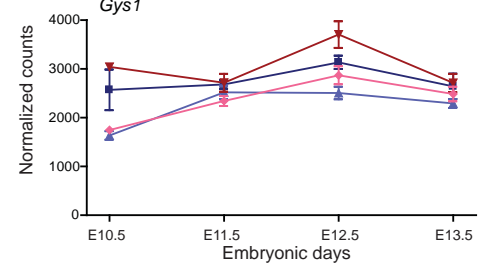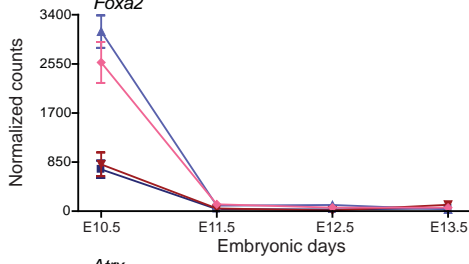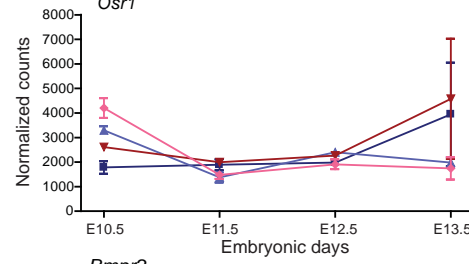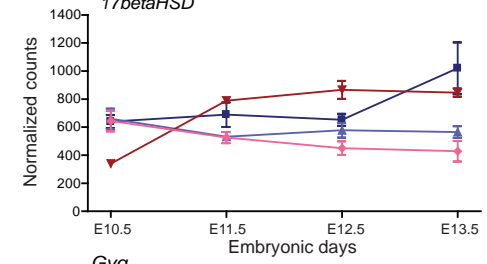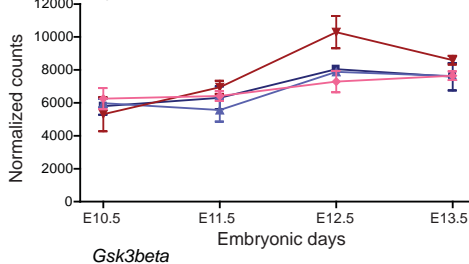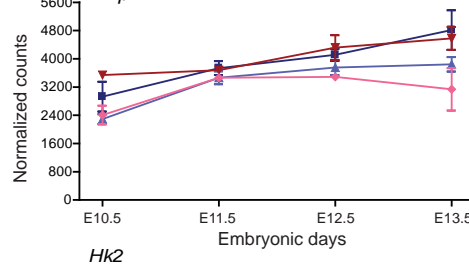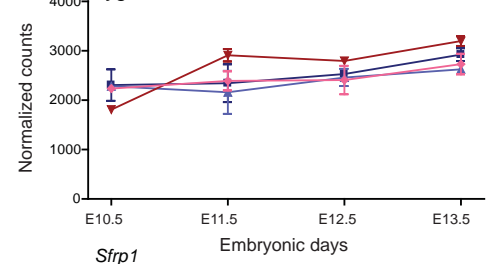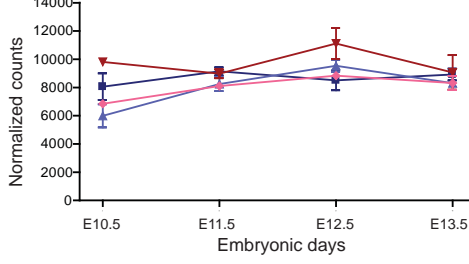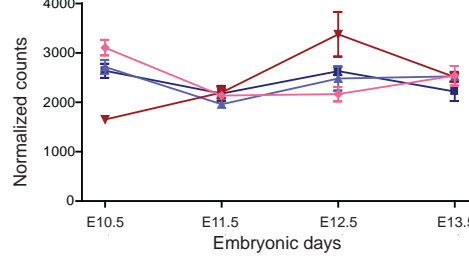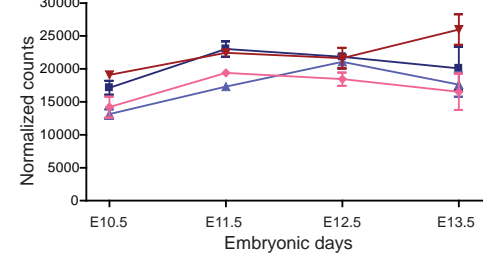

Pitetti\_Supp.Fig8B (V) Insulin/Igfs signaling pathway associated genes

■ M ctrl  
▲ M mut  
▼ F ctrl  
◆ F mut

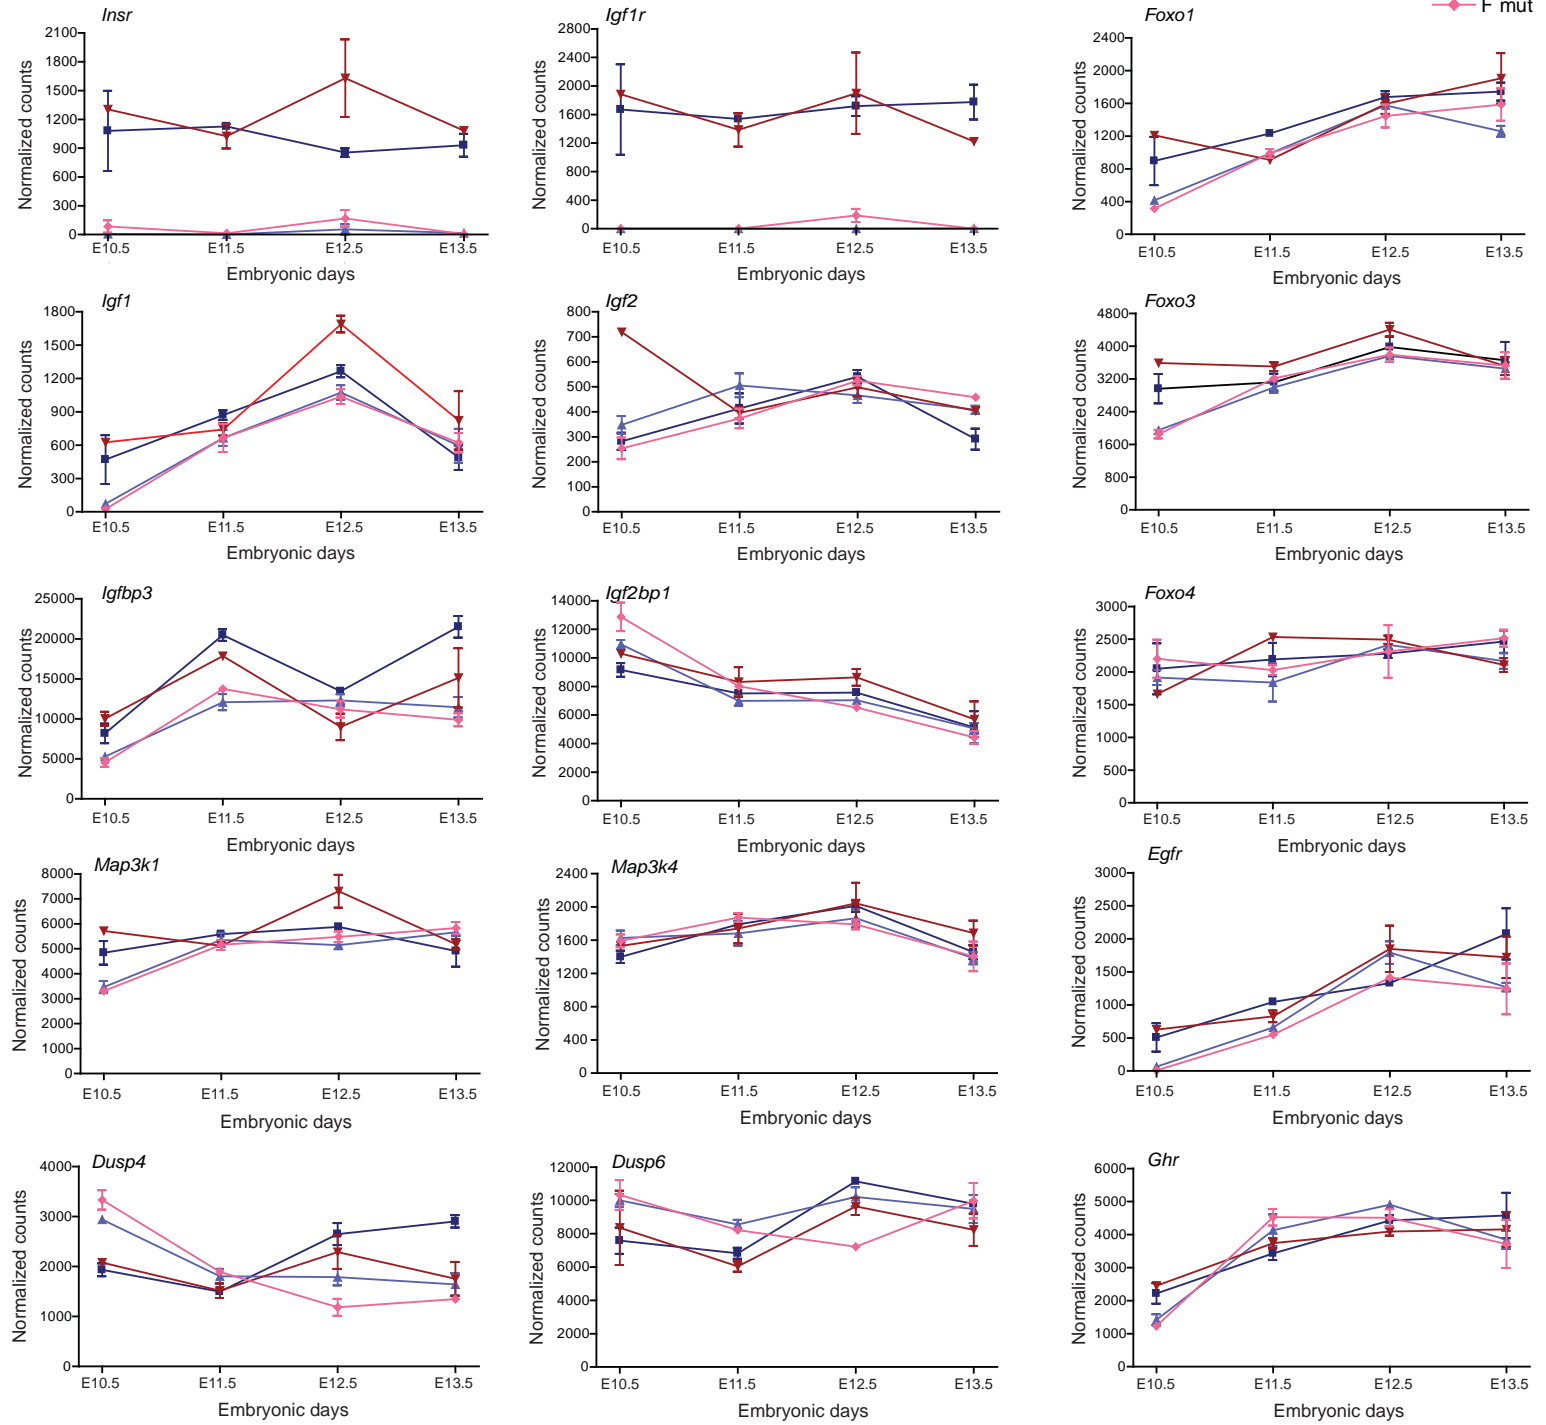

Supplement: pgen.1003160.s008.pdf [file pgen.1003160.s008.pdf]
