# Supplementary material for: Insulin and IGF1 Receptors Are Essential for XX and XY Gonadal Differentiation and Adrenal Development in Mice
Source: PubMed Central journal article supplement (PMC3536656; doi:10.1371/journal.pgen.1003160), 2013-01-03

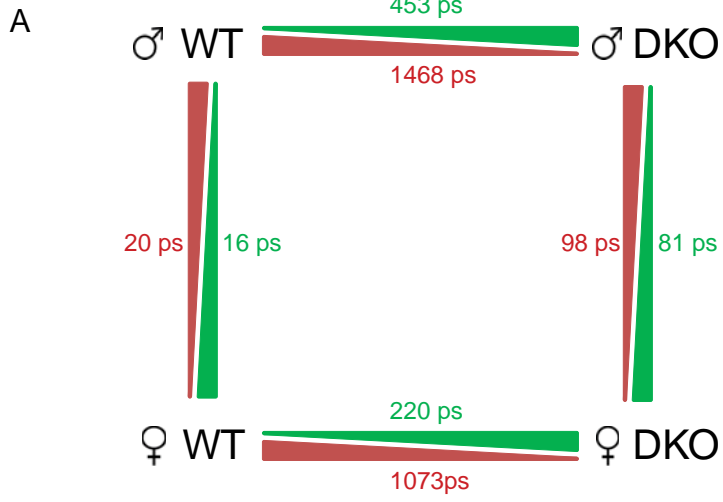

A  $X$  ps B : probesets **Up**-regulated in B compared to A  
 A  $X$  ps B : probesets **Down**-regulated in B compared to A

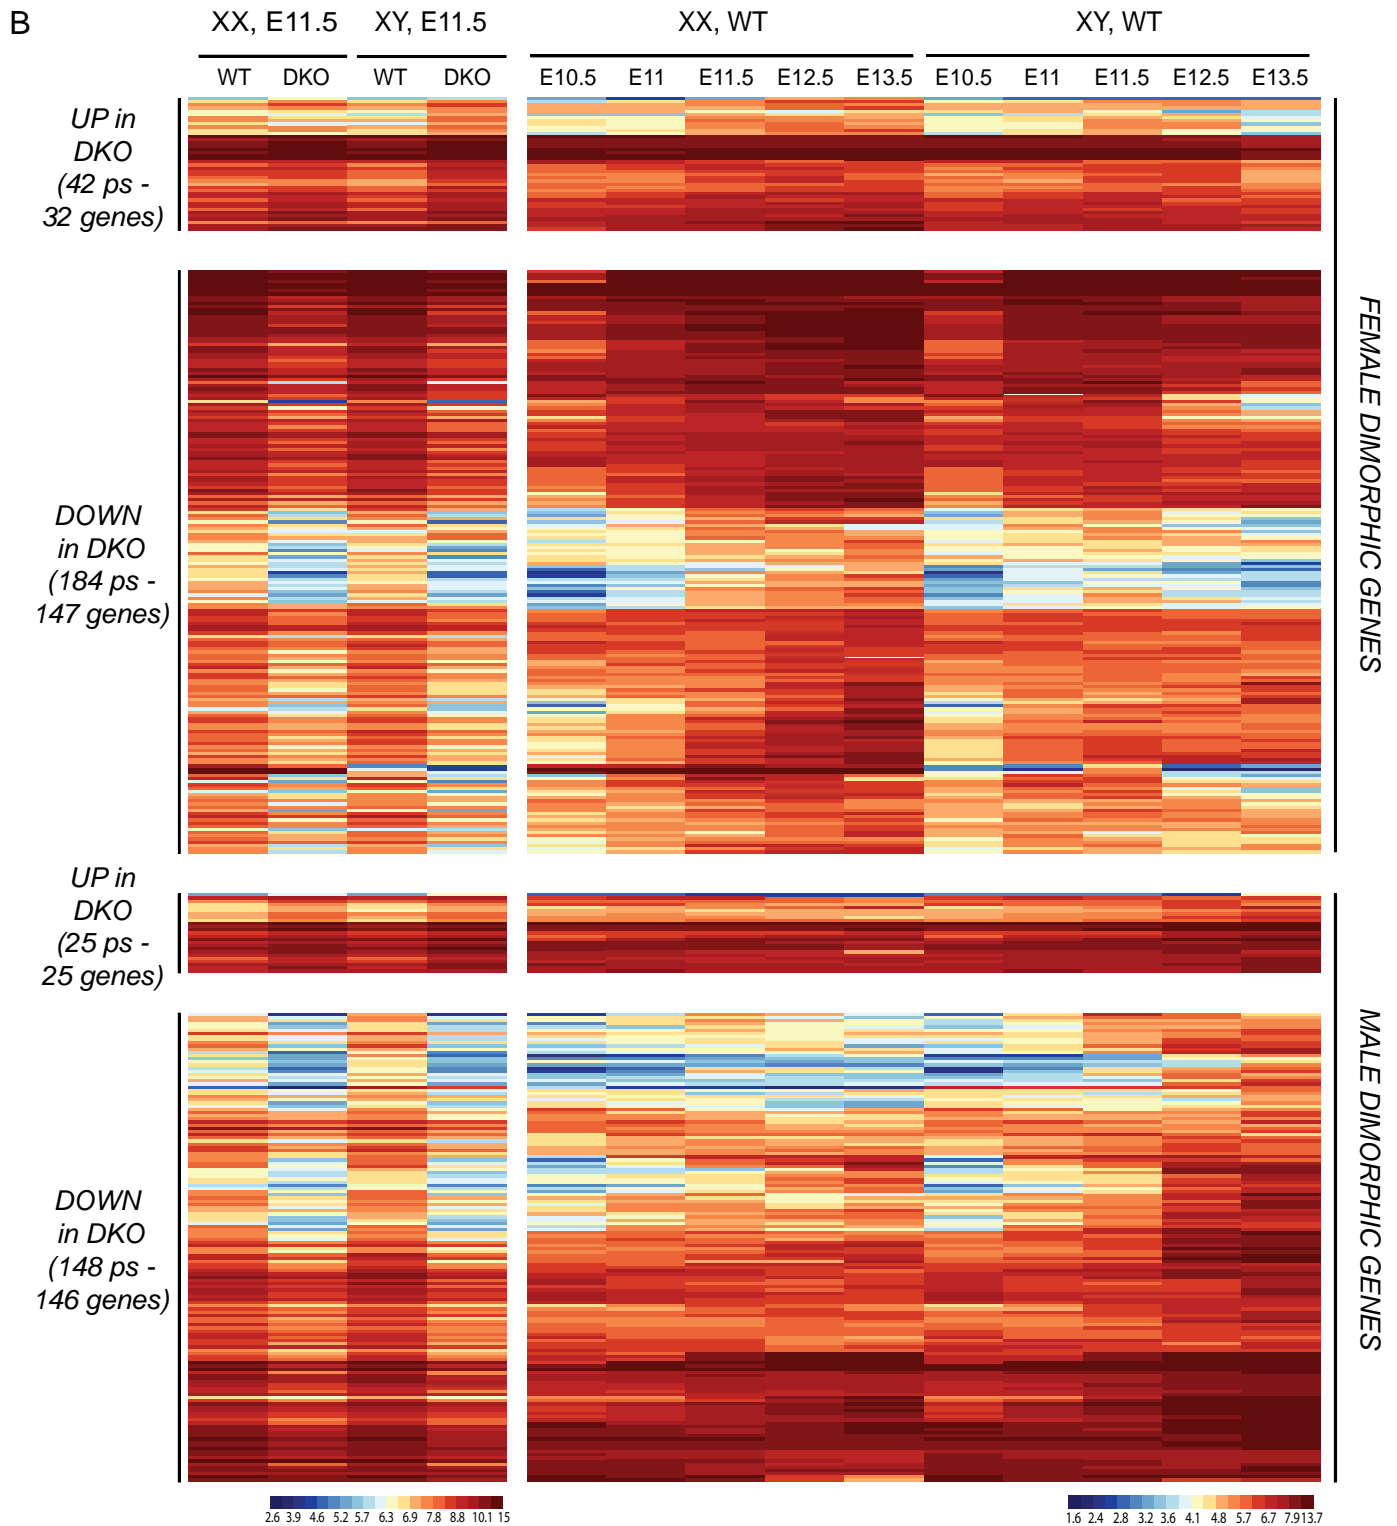

Supplement: pgen.1003160.s004.pdf [file pgen.1003160.s004.pdf]
