# Supplementary material for: Insulin and IGF1 Receptors Are Essential for XX and XY Gonadal Differentiation and Adrenal Development in Mice
Source: PubMed Central journal article supplement (PMC3536656; doi:10.1371/journal.pgen.1003160), 2013-01-03

Pitetti\_Supp.Fig7

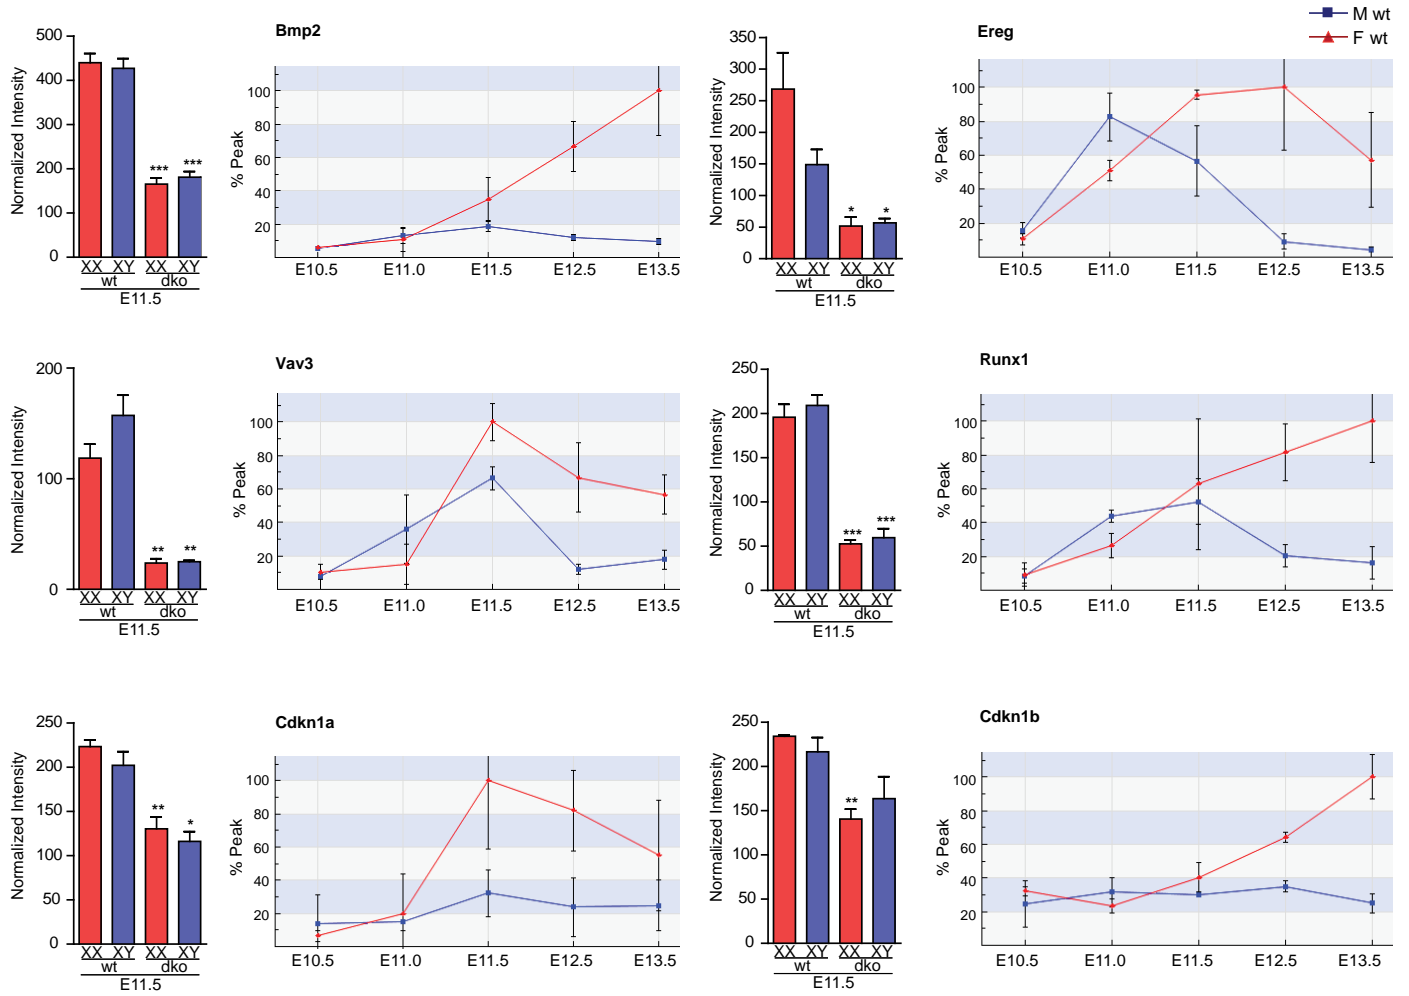

Supplement: pgen.1003160.s007.pdf [file pgen.1003160.s007.pdf]
