# Supplementary material for: Insulin and IGF1 Receptors Are Essential for XX and XY Gonadal Differentiation and Adrenal Development in Mice
Source: PubMed Central journal article supplement (PMC3536656; doi:10.1371/journal.pgen.1003160), 2013-01-03
Supplement: pgen.1003160.s014.pdf [file pgen.1003160.s014.pdf]

Pitetti\_Supp.Table2

Statistical analysis of the sources of gene expression variation for 65 selected genes measured by Nanostring Ncounter system

| Type          | Gene name | p-value(Sex) | p-value(Time) | p-value(Genotype) | p-value(Sex * Time) | p-value(Sex * Time * Genotype) | p-value(Sex * Genotype) | p-value(Time * Genotype) |
|---------------|-----------|--------------|---------------|-------------------|---------------------|--------------------------------|-------------------------|--------------------------|
| Male          | Aard      | 7.89E-07     | 7.22E-06      | 0.00887257        | 0.004268            | 0.0205069                      | 0.0217902               | 0.00011058               |
|               | Aldh1a7   | 0.00056868   | 4.31E-06      | 0.0309891         | 2.15E-05            | 0.224282                       | 0.220524                | 0.550698                 |
|               | Amh       | 0.000518285  | 7.31E-08      | 0.00289804        | 0.0107594           | 0.0646822                      | 0.180553                | 0.00923114               |
|               | Cbln1     | 4.50E-06     | 0.000372044   | 0.196203          | 0.00298621          | 0.0545865                      | 0.019468                | 0.0501541                |
|               | Cbln4     | 0.00274205   | 8.14E-05      | 0.0016722         | 0.242616            | 0.208109                       | 0.0996358               | 0.515807                 |
|               | Cyp11a1   | 0.264428     | 0.0155193     | 7.32E-10          | 0.845861            | 0.426172                       | 0.928067                | 0.224844                 |
|               | Cyp26b1   | 2.98E-06     | 5.55E-07      | 0.0421888         | 0.00468659          | 0.080635                       | 0.04974                 | 0.0671024                |
|               | Dmrt1     | 0.0580965    | 9.49E-13      | 2.91E-06          | 0.410085            | 0.275815                       | 0.899191                | 0.063408                 |
|               | Hsd3b1    | 0.0973257    | 0.000158052   | 7.23E-06          | 0.220929            | 0.435141                       | 0.673718                | 0.500304                 |
|               | Ptgds     | 2.03E-05     | 0.00192321    | 3.48E-06          | 0.0891011           | 0.171488                       | 0.188442                | 0.00936792               |
|               | Sox8      | 0.00027714   | 4.26E-06      | 0.446624          | 0.144152            | 0.219304                       | 0.0819604               | 0.000301759              |
|               | Sry       | 1.23E-12     | 0.00176406    | 0.00719349        | 0.162085            | 2.26E-07                       | 0.954546                | 5.06E-07                 |
|               | Star      | 0.13588      | 1.33E-08      | 0.00119045        | 0.0765408           | 0.382316                       | 0.814689                | 0.0350754                |
| Female        | Adm       | 0.0887851    | 0.000452108   | 0.900199          | 0.00633271          | 0.0034318                      | 0.445011                | 0.471592                 |
|               | Bmp2      | 0.441678     | 1.32E-12      | 0.117919          | 0.000912473         | 0.000715452                    | 0.646563                | 0.208184                 |
|               | Cdk6      | 0.0164219    | 2.65E-07      | 4.86E-05          | 0.000769984         | 0.000997711                    | 0.0176162               | 0.000456346              |
|               | Dmrt1     | 0.522985     | 9.02E-13      | 0.0224719         | 0.0436692           | 0.00987406                     | 0.556226                | 8.53E-05                 |
|               | Ereg      | 0.282433     | 0.00911543    | 0.340135          | 0.505364            | 0.105101                       | 0.218234                | 0.0282869                |
|               | Foxl2     | 0.000230462  | 4.51E-18      | 0.23971           | 0.00484295          | 0.0220442                      | 0.00129153              | 7.04E-05                 |
|               | Fst       | 0.0200159    | 4.07E-06      | 8.23E-06          | 1.96E-06            | 0.000341439                    | 0.204396                | 0.00225453               |
|               | Kctd14    | 0.431103     | 5.28E-10      | 0.000219814       | 0.253829            | 0.972863                       | 0.782705                | 0.000179869              |
|               | Lef1      | 0.0260741    | 9.24E-07      | 0.0537444         | 0.000867035         | 0.000776362                    | 0.105904                | 0.00637517               |
|               | Lgr5      | 0.330619     | 4.47E-12      | 0.354437          | 0.00892831          | 0.920396                       | 0.670121                | 0.26556                  |
|               | Nr0b1     | 0.00285412   | 1.51E-06      | 0.166295          | 0.00255933          | 0.0415531                      | 0.508838                | 0.837744                 |
|               | Pdk1      | 0.0191171    | 0.107605      | 1.73E-05          | 0.0643183           | 0.0840302                      | 0.041303                | 0.000164227              |
|               | Rspo1     | 0.510969     | 0.0111562     | 0.00221638        | 0.108557            | 0.0803197                      | 0.35581                 | 0.130151                 |
|               | Runx1     | 0.542254     | 1.90E-13      | 0.240942          | 0.381735            | 5.56E-05                       | 0.0760154               | 0.298945                 |
|               | Wnt4      | 0.0521346    | 7.42E-07      | 0.0851581         | 0.000190486         | 0.00179602                     | 0.0328074               | 0.0256254                |
| AGP           | Cbx2      | 0.0477313    | 0.0218862     | 0.0363446         | 0.0274435           | 0.0124478                      | 0.0450702               | 0.0211031                |
|               | Cited2    | 0.126082     | 0.066628      | 0.0774061         | 0.0403257           | 0.0432272                      | 0.0855457               | 0.097535                 |
|               | Lhx9      | 0.271766     | 0.0618636     | 0.142397          | 0.0940883           | 0.169923                       | 0.360752                | 0.431799                 |
|               | Pbx1      | 0.190979     | 0.0158617     | 0.258422          | 0.142976            | 0.1391                         | 0.11847                 | 0.159921                 |
|               | Sf1       | 0.201178     | 0.121648      | 0.730323          | 0.135643            | 0.217516                       | 0.188013                | 0.125467                 |
|               | Wt1       | 0.426215     | 0.0151828     | 0.162897          | 0.241373            | 0.248678                       | 0.295092                | 0.485728                 |
| Miscellaneous | Atrx      | 0.10927      | 0.0255085     | 0.286786          | 0.137331            | 0.0917654                      | 0.216659                | 0.0713447                |
|               | Bmp2k     | 0.00139918   | 1.58E-10      | 0.871399          | 0.000290676         | 0.0122113                      | 0.0616359               | 0.378319                 |
|               | Bmpr2     | 0.00327042   | 3.89E-06      | 0.0314133         | 0.000639573         | 0.000418747                    | 0.00544623              | 0.000738944              |
|               | Flrt2     | 0.323805     | 9.23E-07      | 0.861583          | 0.176892            | 0.221571                       | 0.303094                | 0.771204                 |
|               | Foxa2     | 0.484583     | 8.84E-08      | 0.117504          | 0.229149            | 0.664491                       | 0.822675                | 0.0558992                |
|               | Gsk3b     | 0.150403     | 0.0330295     | 0.214115          | 0.109559            | 0.0788842                      | 0.127951                | 0.112725                 |
|               | Gyg       | 0.002599     | 0.00446397    | 0.412631          | 0.00921894          | 0.0018164                      | 0.272565                | 0.00118454               |
|               | Gys1      | 0.156417     | 0.00535276    | 0.526522          | 0.0824964           | 0.0807416                      | 0.0847577               | 0.199916                 |
|               | Hk2       | 0.00273634   | 0.000438468   | 0.00231123        | 7.05E-05            | 2.92E-05                       | 0.00166137              | 1.28E-05                 |
|               | Osr1      | 0.0192175    | 0.0164746     | 0.00962196        | 0.00267254          | 0.000649032                    | 0.0153359               | 7.24E-06                 |
|               | Pdgfa     | 0.0288712    | 1.42E-06      | 0.922405          | 0.0888463           | 0.0465993                      | 0.0965798               | 0.0157954                |
|               | Pdgfra    | 0.0869173    | 0.000423024   | 0.723246          | 0.211501            | 0.154334                       | 0.0581883               | 0.256742                 |
|               | Pten      | 0.0123291    | 1.24E-05      | 0.0835117         | 0.000874204         | 0.000565263                    | 0.00832098              | 0.000387927              |
|               | Sfrp1     | 0.132176     | 0.0154975     | 0.369763          | 0.113481            | 0.0842271                      | 0.136312                | 0.12951                  |
|               | Sod1      | 0.153024     | 0.200898      | 0.34625           | 0.169299            | 0.141882                       | 0.207599                | 0.0859032                |
|               | Ugp2      | 0.141406     | 0.0606518     | 0.361768          | 0.170757            | 0.1641                         | 0.147049                | 0.255649                 |

| Type         | Gene name | p-value(Sex) | p-value(Time) | p-value(Genotype) | p-value(Sex * Time) | p-value(Sex * Time * Genotype) | p-value(Sex * Genotype) | p-value(Time * Genotype) |
|--------------|-----------|--------------|---------------|-------------------|---------------------|--------------------------------|-------------------------|--------------------------|
| Ins.Sig.Path | Dusp4     | 0.000715936  | 0.00370326    | 0.00528656        | 0.00131239          | 0.000420082                    | 0.00154399              | 5.34E-06                 |
|              | Dusp6     | 0.0768455    | 0.182794      | 0.0454587         | 0.218951            | 0.171021                       | 0.0998682               | 0.0710637                |
|              | Egfr      | 2.03E-05     | 1.84E-18      | 0.0113278         | 6.45E-07            | 0.85583                        | 0.710896                | 0.0712632                |
|              | Foxo1     | 0.00810613   | 1.69E-10      | 0.154744          | 0.00118197          | 0.00676364                     | 0.0129484               | 0.0465197                |
|              | Foxo3     | 0.0988645    | 0.00166643    | 0.331153          | 0.0648739           | 0.0833001                      | 0.103211                | 0.263256                 |
|              | Foxo4     | 0.00251707   | 0.0063528     | 0.348191          | 0.0143606           | 0.00257266                     | 0.186884                | 0.00173544               |
|              | Ghr       | 0.0487523    | 3.40E-06      | 0.280275          | 0.0614548           | 0.106606                       | 0.0728232               | 0.358894                 |
|              | Igf1      | 0.00152079   | 4.68E-11      | 0.0600944         | 0.000877478         | 0.32217                        | 0.432707                | 0.29503                  |
|              | Igf1r     | 0.350868     | 0.00475822    | 2.02E-20          | 0.0951514           | 0.0543006                      | 0.500558                | 0.278615                 |
|              | Igf2      | 0.0159399    | 4.03E-06      | 0.00664728        | 0.00284878          | 0.0112539                      | 0.111157                | 0.0116656                |
|              | Igf2bp1   | 0.124855     | 0.111828      | 0.0904877         | 0.0937187           | 0.0565931                      | 0.096018                | 0.0225897                |
|              | Igfbp3    | 0.150048     | 0.000196632   | 0.817481          | 0.25278             | 0.263471                       | 0.24321                 | 0.268051                 |
|              | Insr      | 0.940791     | 0.0104261     | 3.61E-18          | 0.666519            | 0.0903757                      | 0.140456                | 0.0391319                |
|              | Map3k1    | 0.00547486   | 1.25E-05      | 0.0144828         | 0.000275904         | 0.000368284                    | 0.00558629              | 0.0015546                |
|              | Map3k4    | 0.00187437   | 5.88E-05      | 0.0390162         | 0.00126243          | 0.00040437                     | 0.0399648               | 0.000129152              |

## Statistical analysis:

Concerning the NanoString Ncounter gene expression analysis, we built an Anova model in Partek Genomic suite (Partek inc, St Louis (MI) USA) to estimate the importance of each parameter. In this model we included the time, sex, genotype, and all combined interactions. The equation of the linear model is:  $Y_{ijklmn} = \mu + \text{Sex}_i + \text{Time}_j + \text{Genotype}_k + \text{Tissues}_l + \text{Replicate}_m + \text{Sex} * \text{Time}_{ij} + \text{Sex} * \text{Time} * \text{Genotype} * \text{Tissues}_{ijkl} + \text{Sex} * \text{Genotype}_{ik} + \text{Sex} * \text{Tissues}_{il} + \text{Time} * \text{Genotype}_{jk} + \text{Time} * \text{Tissues}_{jl} + \text{Genotype} * \text{Tissues}_{kl} + \epsilon_{ijklmn}$ . Where  $Y_{ijklmn}$  represents the  $n$ th observation on the  $i$ th Sex  $j$ th Time  $k$ th Genotype  $l$ th Tissues  $m$ th Replicate.  $\mu$  is the common effect for the whole experiment.  $\epsilon_{ijklmn}$  represents the random error present in the  $n$ th observation on the  $i$ th Sex  $j$ th Time  $k$ th Genotype  $l$ th Tissues  $m$ th Replicate. The errors  $\epsilon_{ijklmn}$  are assumed to be normally and independently distributed with mean 0 and standard deviation  $\delta$  for all measurements. Replicate is a random effect. Then we calculate the effect of each factor as described in (Eisenhart 1947).
