# Supplementary material for: Insulin and IGF1 Receptors Are Essential for XX and XY Gonadal Differentiation and Adrenal Development in Mice
Source: PubMed Central journal article supplement (PMC3536656; doi:10.1371/journal.pgen.1003160), 2013-01-03
Supplement: pgen.1003160.s015.pdf [file pgen.1003160.s015.pdf]

**SUPPLEMENTARY TABLE 3: Reagents and antibodies****Primary antibodies:**

| Protein targeted     | Host             | Dilution | Clone | Provider                             | Catalogue number |
|----------------------|------------------|----------|-------|--------------------------------------|------------------|
| SRY                  | Rabbit           | -        | -     | Dagmar Wilhelm (Aus)                 |                  |
| SOX9                 | Rabbit           | -        | -     | Dagmar Wilhelm (Aus)                 |                  |
| 3 $\beta$ -HSD       | Rabbit           | 1:1000   | -     | Kenichirou Morohashi (Kyushu, Japan) |                  |
| P450SCC              | Rabbit           | 1:200    | -     | Dagmar Wilhelm (Aus)                 |                  |
| FOXL2                | Rabbit           | 1:1000   | -     | Dagmar Wilhelm (Aus)                 |                  |
| WT1                  | Mouse            | 1:500    | -     | DakoCytomation (CA, USA)             |                  |
| SCP3                 | Mouse            | 1:200    | -     | Abcam ( USA)                         | Ab15092          |
| OCT4                 | Mouse            | 1:200    | -     | Santa Cruz Biotechnology (CA, USA)   | Sc-5279          |
| E-Cadherin           | Mouse            | 1:200    | -     | Becton Dickinson                     |                  |
| Cleaved caspase 3    | Rabbit           | 1:200    | -     | Santa Cruz Biotechnology (CA, USA)   | Sc-22171         |
| SF1                  | Rabbit           | 1:1000   | -     | Kenichirou Morohashi (Kyushu, Japan) |                  |
| $\beta$ -Catenin     | Mouse monoclonal | 1:100    | 14    | Becton Dickinson                     | BD610153         |
| Tyrosine hydroxylase | Rabbit           | 1:100    | -     | Cell Signaling (CA, USA)             | 2792             |
| INSR                 | Rabbit           | 1:1000   |       | Santa Cruz Biotechnology (CA, USA)   | Sc-711           |
| IGF1R                | Rabbit           | 1:1000   |       | Santa Cruz Biotechnology (CA, USA)   | Sc-712           |
| Actin                | Mouse monoclonal | 1:1000   | C-4   | Chemicon (Milipore)                  | MAB1501          |
| KI-67                | Mouse            | 1:100    |       | Becton Dickinson                     |                  |

**Secondary antibodies:**

| Protein targeted                                | Host            | Dilution | Provider                          | Catalogue number |
|-------------------------------------------------|-----------------|----------|-----------------------------------|------------------|
| HRP-conjugated anti-mouse antibodies            | Goat            |          | Biorad (Basel, Switzerland)       | 170-6516         |
| HRP-conjugated anti-rabbit antibodies           | Goat            |          | Biorad (Basel, Switzerland)       | 170-6515         |
| HRP-conjugated anti-goat antibodies             | Rabbit          |          | Sigma (St Louis, MO)              | A5420            |
| Anti-guinea pig Alexa 488                       | Goat            | 1:500    | Invitrogen (OR, USA)              | A11073           |
| Anti-rabbit Alexa 594                           | Goat            | 1:500    | Invitrogen (OR, USA)              | A11012           |
| Anti-guinea pig phosphatase alkaline antibodies | Goat and Donkey | 1:500    | Jackson Immuno Research (PA, USA) | 706-055-148      |

|                                    |        |       |                                   |             |
|------------------------------------|--------|-------|-----------------------------------|-------------|
| Anti-mouse biotinylated antibodies | Donkey | 1:500 | Jackson Immuno Research (PA, USA) | 715-065-150 |
|------------------------------------|--------|-------|-----------------------------------|-------------|

**Other reagents:**

| <b>Name</b>                                                        | <b>Provider</b>                     | <b>Catalogue number</b> |
|--------------------------------------------------------------------|-------------------------------------|-------------------------|
| Complete EDTA-free inhibitors                                      | Roche (Basel, Switzerland)          | 11873580001             |
| ECL reagent                                                        | Amersham (Dübendorf, Switzerland)   | RPN2135                 |
| Nitrocellulose membranes                                           | Amersham (Dübendorf, Switzerland)   | RPN303D                 |
| Trizol Reagent                                                     | Invitrogen (Carlsbad, CA)           | 15596-018               |
| random hexamer primers                                             | Invitrogen (Carlsbad, CA)           | 48190-011               |
| SuperScript II Reverse Transcriptase                               | Invitrogen (Carlsbad, CA)           | 18064-022               |
| SYBR green PCR master mix                                          | Applied Biosystems                  | 4309155                 |
| BCA protein assay kit                                              | Pierce (Lausanne, Switzerland)      |                         |
| RNeasy Micro Kit                                                   | Qiagen (Hombrechtikon, Switzerland) | 74004                   |
| MessageAmp™ II-Biotin Enhanced Single Round aRNA Amplification Kit | Ambion                              | AM1791                  |
| Mouse Genome 430 2.0 Arrays                                        | Affymetrix, High Wycombe, UK        |                         |
| TUNEL reaction                                                     | Roche Applied Science               | 11767305001             |
|                                                                    |                                     |                         |
|                                                                    |                                     |                         |
