# Supplementary material for: Insulin and IGF1 Receptors Are Essential for XX and XY Gonadal Differentiation and Adrenal Development in Mice
Source: PubMed Central journal article supplement (PMC3536656; doi:10.1371/journal.pgen.1003160), 2013-01-03
Supplement: pgen.1003160.s016.pdf [file pgen.1003160.s016.pdf]

**SUPPLEMENTARY TABLE 4: Primer Sequences for Real-Time PCR**

| <b>Mouse</b>         | <b>Forward</b>                    | <b>Reverse</b>                     |
|----------------------|-----------------------------------|------------------------------------|
| <b>Sf-1</b>          | 5' CCTCTTCAGCCTCGATGTGAA 3'       | 5' GGCAGCGGTTGGCCTTTT 3'           |
| <b>Sry</b>           | 5' TACAGGCTGCAGTTGCCTCA 3'        | 5' TGTCCCACTGCAGAAGGTTGT 3'        |
| <b>Sox9</b>          | 5' GTACCCGCATCTGCACAAC 3'         | 5' CTCCACGAAGGGTCTCTTCTC 3'        |
| <b>Fgf9</b>          | 5' TGCCAGAGAAACAGCCG 3'           | 5' TCTTCAATCCATCCGATGCA 3'         |
| <b>Amh</b>           | 5' TAGTCCTACATCTGGCTGAGTGATATG 3' | 5' CCAGGTGGAGGCTCTTGGA 3'          |
| <b>Ptgds</b>         | 5' TCGACCGCAGCAAGCAA 3'           | 5' TGAGGGACAGGTGCAGGTA 3'          |
| <b>Cyp11a1</b>       | 5' CTGGGATGTGATTTTCAATAAAGCT 3'   | 5' CAGTAGAAGTTCTGGGTGTACTCATCAG 3' |
| <b>Gys</b>           | 5' TTGTCGGACTTGCTAGATTGGAA 3'     | 5' CGCGCAGACATGTAGTACCG 3'         |
| <b>Rspo1</b>         | 5' CCGCTAACAGCACCATGGA 3'         | 5' CGCTCATTTACATTGTGCAG 3'         |
| <b>Wnt4</b>          | 5' CGCGAGCAATTGGCTGTAC 3'         | 5' GAGATGCTGCCACCGAT 3'            |
| <b>Foxl2</b>         | 5' GAGCTCGCCATGATGCATT 3'         | 5' GCCCGTCTTGCTGTCGTG 3'           |
| <b>Lef1</b>          | 5' CTACCACGACAAGGCCAGAGA 3'       | 5' CCGTCTGGATGCTTTTCTTC 3'         |
| <b>Insr</b>          | 5' GGACCATGCCTGAAGCTAAG 3'        | 5' GGACCATGCCTGAAGCTAAG 3'         |
| <b>Igf1r</b>         | 5' AGGCTGAGAAGCTGGGCTGCA 3'       | 5' ACAGAAGCATAACAGCACTCCA 3'       |
| <b>Cyclophilin B</b> | 5' ATGTGGTTTTCGGCAAAGTT 3'        | 5' TGACATCCTTCAGTGGCTTG 3'         |
| <b>Tubulin beta</b>  | 5' GCAGTGCGGCAACCAGAT 3'          | 5' AGTGGGATCAATGCCATGCT 3'         |
| <b>Actin beta</b>    | 5' CTAAGGCCAACCCTGAAAAGAT 3'      | 5' CACAGCCTGGATGGCTACGT 3'         |
| <b>Tubulin a2</b>    | 5' AGGAGCTGGCAAGCATGTG 3'         | 5' CGGTGCGAACTTCATCGAT 3'          |
